# Supplementary material
Source: PubMed Central journal article supplement (PMC8205237)
Supplement: pt1c00047_si_001.pdf [file pt1c00047_si_001.pdf]

# PHENOLIC PRESERVATIVE REMOVAL FROM COMMERCIAL INSULIN FORMULATIONS REDUCES TISSUE INFLAMMATION, WHILE MAINTAINING EUGLYCEMIA

**Adam Mulka<sup>1</sup>, Brianne E. Lewis<sup>1</sup>, Li Mao<sup>1</sup>, Roshanak Sharafieh<sup>2</sup>, Shereen Kesserwan<sup>1</sup>, Rong Wu<sup>2</sup>, Donald L. Kreutzer<sup>2</sup>, Ulrike Klueh<sup>1\*</sup>**

<sup>1</sup>Department of Biomedical Engineering,  
Integrative Biosciences Center  
Wayne State University, Detroit, MI

<sup>2</sup>Department of Surgery,  
School of Medicine.  
University of Connecticut,  
Farmington, CT.

\*Corresponding Author:  
Ulrike Klueh Ph. D.  
Department of Biomedical Engineering,  
Wayne State University  
Detroit, MI 48202  
Email: [klueh@wayne.edu](mailto:klueh@wayne.edu)

## **Table of Contents**

|                                  |     |
|----------------------------------|-----|
| Supplementary Figures 1 & 2..... | S-2 |
| Supplementary Table 1.....       | S-3 |
| Supplementary Table 2.....       | S-4 |

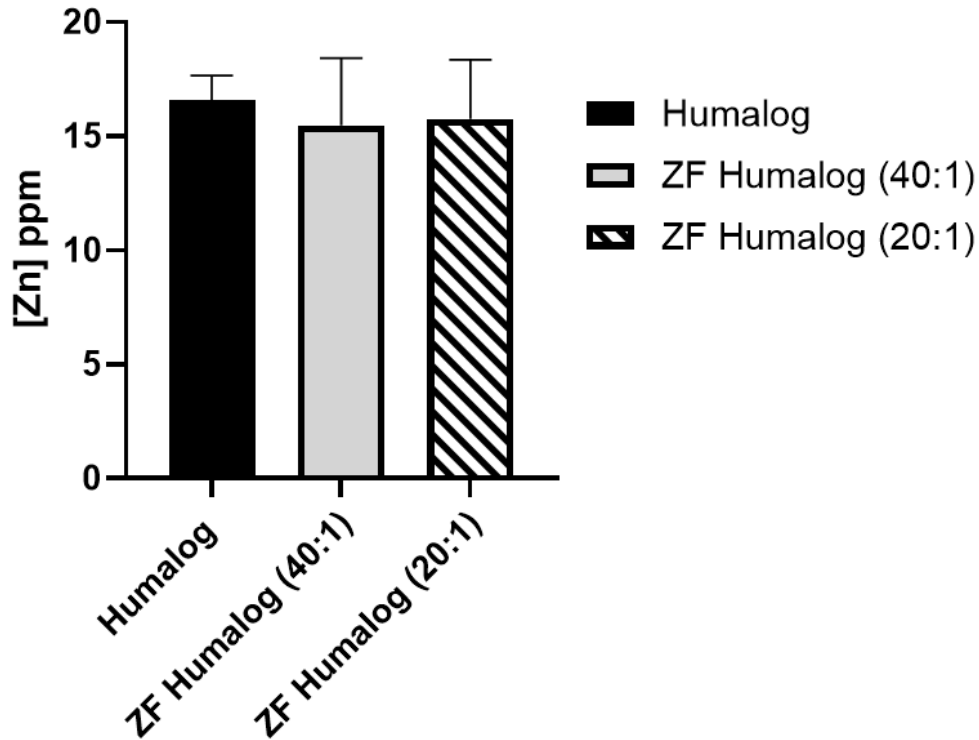

**Figure S-1: ICP-MS for Zinc Filtration:** Zeolite Y filtered Humalog samples were submitted to the Lumigen core facility for ICP-MS analysis. Unfiltered Humalog used as a control. This data demonstrates the selective exclusion of phenol and m-cresol by the zeolite.

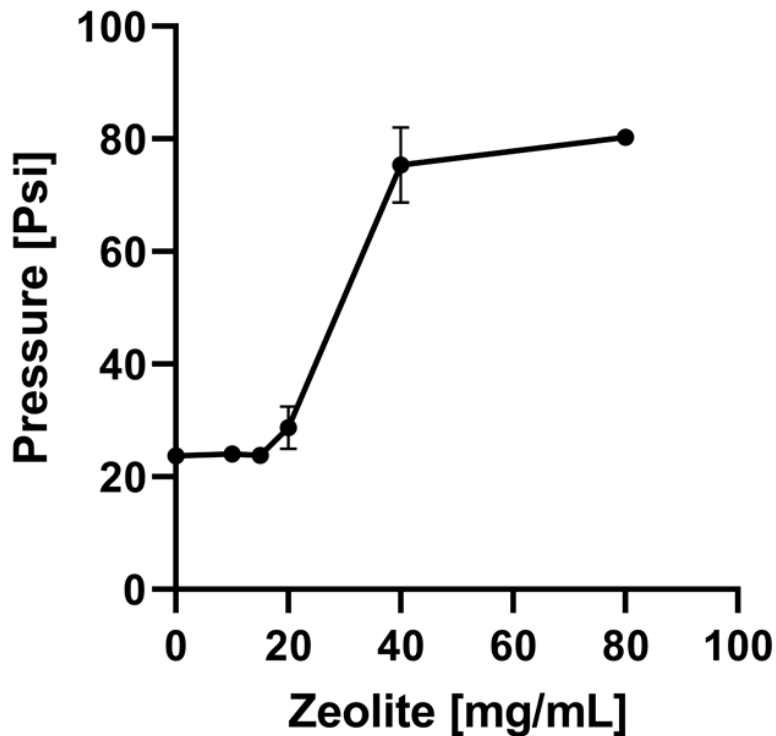

**Figure S-2: In-line Pressure Monitoring:** As the amount of Zeolite Y in the in-line filter system increased, in-line backpressure increased proportionally. This data demonstrates the need to minimize zeolite/ alleviate pressure in the proposed system.

| Cell Type      |           | RAW Macrophage |         | BMMC    |         | 3T3-L1 Fibroblast |         | 3T3-L1 Fat Cell |         |
|----------------|-----------|----------------|---------|---------|---------|-------------------|---------|-----------------|---------|
| Dilution Ratio | Treatment | 1-dav          | 3-dav   | 1-dav   | 3-dav   | 1-dav             | 3-dav   | 1-dav           | 3-dav   |
|                |           | 1/3            | I vs. D | NS      | NS      | NS                | NS      | <0.04           | NS      |
| I vs. S        | <0.0001   |                | <0.0001 | <0.0001 | <0.0001 | <0.0001           | <0.0001 | <0.0001         | <0.0001 |
| I vs. ZI       | <0.0001   |                | <0.0001 | <0.0001 | <0.0001 | <0.0001           | <0.0001 | <0.0001         | <0.0001 |
| D vs. S        | <0.0001   |                | <0.0001 | <0.0001 | <0.0001 | <0.0001           | <0.0001 | <0.0001         | <0.0001 |
| D vs. ZD       | <0.0001   |                | <0.0001 | <0.0001 | <0.0001 | <0.0001           | <0.0001 | <0.0001         | <0.0001 |
| 1/6            | I vs. D   | <0.0001        | <0.0001 | <0.0001 | 0.0002  | <0.0001           | <0.0001 | <0.0001         | <0.0001 |
|                | I vs. S   | <0.0001        | <0.0001 | <0.0001 | <0.0001 | <0.0001           | <0.0001 | <0.0001         | <0.0001 |
|                | I vs. ZI  | <0.0001        | <0.0001 | <0.0001 | <0.0001 | <0.0001           | <0.0001 | <0.0001         | <0.0001 |
|                | D vs. S   | <0.0001        | <0.0001 | <0.0001 | <0.0001 | NS                | <0.0001 | <0.0001         | NS      |
|                | D vs. ZD  | <0.0001        | <0.0001 | <0.0001 | <0.0001 | <0.0001           | <0.0001 | <0.0001         | NS      |
| 1/12           | I vs. D   | <0.0001        | <0.0001 | <0.01   | <0.01   | NS                | <0.0001 | 0.0136          | NS      |
|                | I vs. S   | <0.0001        | <0.0001 | <0.0001 | <0.0001 | NS                | <0.0001 | <0.0001         | <0.0001 |
|                | I vs. ZI  | <0.0001        | <0.0001 | <0.0001 | <0.0001 | NS                | <0.0001 | NS              | <0.0001 |
|                | D vs. S   | <0.0001        | <0.0001 | <0.0001 | <0.0001 | NS                | <0.0001 | <0.0001         | <0.001  |
|                | D vs. ZD  | <0.0001        | <0.0001 | <0.0001 | <0.0001 | 0.02              | <0.0001 | NS              | 0.03    |
| 1/24           | I vs. D   | <0.0001        | <0.0001 | <0.01   | <0.01   | NS                | <0.01   | <0.001          | NS      |
|                | I vs. S   | <0.0001        | <0.0001 | <0.0001 | NS      | NS                | <0.0001 | <0.0001         | <0.0001 |
|                | I vs. ZI  | <0.0001        | <0.0001 | <0.0001 | NS      | NS                | NS      | 0.0029          | <0.0001 |
|                | D vs. S   | NS             | <0.0001 | <0.0001 | 0.01    | NS                | <0.0001 | NS              | <0.0001 |
|                | D vs. ZD  | NS             | <0.0001 | NS      | NS      | NS                | NS      | NS              | NS      |
| 1/48           | I vs. D   | NS             | <0.01   | 0.001   | <0.0001 | 0.01              | 0.01    | NS              | NS      |
|                | I vs. S   | NS             | <0.0001 | NS      | <0.0001 | NS                | <0.0001 | <0.0001         | NS      |
|                | I vs. ZI  | NS             | <0.0001 | <0.0001 | <0.0001 | NS                | <0.0001 | NS              | <0.02   |
|                | D vs. S   | NS             | 0.0021  | <0.0001 | NS      | NS                | <0.0001 | NS              | <0.01   |
|                | D vs. ZD  | NS             | NS      | NS      | NS      | NS                | <0.0001 | NS              | NS      |
| 1/96           | I vs. D   | NS             | NS      | <0.001  | NS      | NS                | NS      | NS              | NS      |
|                | I vs. S   | NS             | NS      | <0.0001 | NS      | <0.0001           | NS      | NS              | 0.02    |
|                | I vs. ZI  | NS             | NS      | <0.0001 | 0.02    | 0.02              | <0.0001 | <0.01           | <0.0001 |
|                | D vs. S   | NS             | NS      | NS      | NS      | <0.0001           | NS      | NS              | 0.003   |
|                | D vs. ZD  | <0.001         | NS      | 0.001   | <0.0001 | <0.0001           | NS      | NS              | NS      |
| 1/192          | I vs. D   | <0.01          | NS      | NS      | NS      | 0.0014            | NS      | <0.01           | <0.0001 |
|                | I vs. S   | NS             | <0.0001 | <0.01   | 0.02    | <0.0001           | NS      | <0.01           | <0.0001 |
|                | I vs. ZI  | <0.001         | NS      | NS      | <0.0001 | NS                | NS      | NS              | <0.0001 |
|                | D vs. S   | <0.01          | <0.0001 | <0.0001 | 0.04    | <0.01             | NS      | NS              | NS      |
|                | D vs. ZD  | <0.001         | NS      | <0.0001 | <0.0001 | NS                | NS      | <0.001          | NS      |

**Table S-1:** *In vitro* Mouse cell Statistics: Statistics calculated using two-way Anova ( $p < 0.05$ ) for 1- and 3-days of exposure in mouse RAW Macrophages, 3T3-L1 Fibroblast, 3T3-L1 derived Fat cells, and BMMC. Tukey multiple comparisons made between saline (S), diluent (D), insulin (I), Zeolite filtered insulin (ZI), and Zeolite filtered diluent (ZD).

| Cell Type      |           | PBMC       |         | HMC-1   |         | THP-1   |         |
|----------------|-----------|------------|---------|---------|---------|---------|---------|
| Dilution Ratio | Treatment | 1-day      | 3-day   | 1-day   | 3-day   | 1-day   | 3-day   |
|                |           | <b>1/3</b> | I vs. D | NS      | NS      | NS      | NS      |
| I vs. S        | <0.0001   |            | <0.0001 | <0.0001 | <0.0001 | <0.0001 | <0.0001 |
| I vs. ZI       | <0.0001   |            | <0.0001 | <0.0001 | <0.0001 | <0.0001 | <0.0001 |
| D vs. S        | <0.0001   |            | <0.0001 | <0.0001 | <0.0001 | <0.0001 | <0.0001 |
| D vs. ZD       | <0.0001   |            | <0.0001 | <0.0001 | <0.0001 | <0.0001 | <0.0001 |
| <b>1/6</b>     | I vs. D   | <0.0001    | <0.0001 | 0.02    | <0.01   | <0.01   | NS      |
|                | I vs. S   | <0.0001    | <0.0001 | <0.0001 | <0.0001 | <0.0001 | <0.0001 |
|                | I vs. ZI  | <0.0001    | <0.0001 | <0.0001 | <0.0001 | <0.0001 | <0.0001 |
|                | D vs. S   | <0.0001    | <0.0001 | <0.0001 | <0.0001 | <0.0001 | <0.0001 |
|                | D vs. ZD  | <0.0001    | <0.0001 | <0.0001 | <0.0001 | <0.0001 | <0.0001 |
| <b>1/12</b>    | I vs. D   | NS         | <0.0001 | NS      | 0.03    | <0.01   | <0.0001 |
|                | I vs. S   | NS         | <0.0001 | <0.0001 | <0.0001 | <0.0001 | <0.0001 |
|                | I vs. ZI  | <0.001     | <0.0001 | <0.0001 | <0.0001 | <0.0001 | <0.0001 |
|                | D vs. S   | NS         | <0.0001 | <0.0001 | <0.0001 | <0.0001 | NS      |
|                | D vs. ZD  | 0.0001     | <0.0001 | <0.0001 | <0.0001 | <0.0001 | <0.0001 |
| <b>1/24</b>    | I vs. D   | NS         | <0.0001 | NS      | NS      | <0.0001 | <0.0001 |
|                | I vs. S   | NS         | <0.0001 | <0.0001 | <0.0001 | <0.0001 | <0.0001 |
|                | I vs. ZI  | NS         | 0.0002  | <0.0001 | NS      | <0.0001 | <0.0001 |
|                | D vs. S   | NS         | NS      | <0.0001 | <0.01   | <0.0001 | 0.0304  |
|                | D vs. ZD  | <0.0001    | NS      | <0.0001 | <0.0001 | <0.0001 | <0.0001 |
| <b>1/48</b>    | I vs. D   | NS         | <0.0001 | NS      | NS      | <0.0001 | <0.0001 |
|                | I vs. S   | NS         | <0.0001 | <0.0001 | <0.01   | <0.0001 | <0.0001 |
|                | I vs. ZI  | <0.0001    | <0.001  | <0.0001 | NS      | <0.0001 | <0.0001 |
|                | D vs. S   | NS         | 0.04    | <0.0001 | 0.03    | 0.02    | NS      |
|                | D vs. ZD  | NS         | <0.0001 | 0.0015  | 0.02    | NS      | NS      |
| <b>1/96</b>    | I vs. D   | <0.0001    | <0.0001 | 0.0126  | NS      | <0.001  | <0.0001 |
|                | I vs. S   | NS         | <0.0001 | <0.0001 | NS      | <0.0001 | NS      |
|                | I vs. ZI  | NS         | NS      | 0.0051  | NS      | <0.0001 | <0.0001 |
|                | D vs. S   | NS         | NS      | <0.0001 | NS      | <0.01   | <0.0001 |
|                | D vs. ZD  | <0.01      | <0.01   | NS      | 0.02    | <0.01   | NS      |
| <b>1/192</b>   | I vs. D   | NS         | <0.0001 | 0.001   | <0.0001 | NS      | NS      |
|                | I vs. S   | NS         | <0.0001 | <0.0001 | NS      | <0.0001 | 0.0008  |
|                | I vs. ZI  | NS         | <0.0001 | 0.003   | NS      | <0.0001 | <0.0001 |
|                | D vs. S   | <0.03      | >0.9999 | <0.0001 | NS      | <0.0001 | 0.0408  |
|                | D vs. ZD  | <0.0001    | <0.0001 | 0.0001  | <0.0001 | <0.0001 | <0.0001 |

**Table S-2:** *In vitro* Human cell Statistics: Statistics calculated using two-way Anova ( $p < 0.05$ ) for 1- and 3-days of exposure in human PBMC, HMC-1, and THP-1 cells. Tukey multiple comparisons made between saline (S), diluent (D), insulin (I), Zeolite filtered insulin (ZI), and Zeolite filtered diluent (ZD).
